# Supplementary material for: Targeted Sequencing Revealed Distinct Mutational Profiles of Ocular and Extraocular Sebaceous Carcinomas
Source: Cancers (Basel). 2021 Sep 26;13(19):4810. doi: 10.3390/cancers13194810 (PMC8508046; doi:10.3390/cancers13194810)
Supplement: Supplementary file 1 [file cancers-13-04810-s001.zip › cancers-1366838-supplementary.xlsx]

## Sheet: Table S1.
Table S1. The information of targeted next-generation sequencing test (Axen Cancer Panel 2).
SNV / INDEL (N=170)
ABL1	ABL2	AKT1	AKT2	AKT3	ALK	APC	AR	ARAF	ASXL1
ATM	ATR	AURKA	AURKB	AURKC	AXL	BAP1	BCL2	BRAF	BRCA1
BRCA2	BRD2	BRD3	BRD4	CBFB	CCND1	CCND2	CCND3	CCNE1	CDH1
CDK12	CDK4	CDK6	CDKN1A	CDKN1B	CDKN2A	CDKN2B	CDKN2C	CEBPA	CHEK2
CREBBP	CRKL	CSF1R	CTNNB1	DDR1	DDR2	DNMT3A	DOT1L	EGFR	EPHA3
ERBB2	ERBB3	ERBB4	ERCC2	ERG	ERRFI1	ESR1	ETV1	ETV4	ETV5
ETV6	EWSR1	EZH2	FBXW7	FGFR1	FGFR2	FGFR3	FGFR4	FLCN	FLT1
FLT3	FLT4	FOXL2	GNA11	GNAQ	GNAS	HDAC9	HGF	HRAS	IDH1
IDH2	IGF1R	IGF2	JAK1	JAK2	JAK3	KDR	KIT	KMT2A	KRAS
MAP2K1	MAP2K2	MAP2K4	MAP3K1	MAP3K4	MAPK1	MAPK3	MAPK8	MCL1	MDM2
MDM4	MED12	MEN1	MET	MITF	MLH1	MPL	MSH2	MSH6	MTOR
MYC	MYCN	MYD88	NF1	NF2	NFKBIA	NKX2-1	NOTCH1	NOTCH2	NOTCH3
NOTCH4	NPM1	NRAS	NTRK1	NTRK2	NTRK3	NUTM1	PDGFB	PDGFRA	PDGFRB
PIK3CA	PIK3CB	PIK3CD	PIK3R1	PIK3R2	POLE	PPARG	PTCH1	PTEN	RAB35
RAD50	RAF1	RARA	RB1	RET	RHEB	RICTOR	RNF43	ROS1	RSPO1
RSPO2	RUNX1	SMAD2	SMAD4	SMARCA4	SMARCB1	SMO	SRC	STK11	SYK
TET2	TMPRSS2	TOP2A	TP53	TSC1	TSC2	VHL	WT1	XPO1	ZNRF3
Fusion (N=25)
ABL1	AKT3	ALK	BCL2	BRAF	EGFR	ERG	ETV1	EWSR1	FGFR1
FGFR2	FGFR3	JAK2	KMT2A	MYC	NPM1	NTRK1	PDGFRA	PDGFRB	PPARG
RAF1	RARA	RET	ROS1	TMPRSS2
Promoter (N=1)
TERT
SNV, single nucleotide variant; INDEL, insertion deletion variant

## Sheet: Table S2.
Table S2. Determination of molecular subtypes of sebaceous carcinoma
Subtype	IHC profile
Luminal 1	≥1 out of 3 HRs (+), HER2 (-)
Luminal 2	≥1 out of 3 HRs (+), HER2 (+)
HER2	HRs (-), HER2 (+)
All-negative	HRs (-), HER2 (-), CK5/6 (-)
Core-Basal	HRs (-), HER2 (-), CK5/6 (+)
IHC, immunohistochemistry; HR, hormone receptor.

## Sheet: Table S3.
Supplementary Table S3. Gene Ontology (GO) analysis of each ocular and extraocular sebaceous carcinoma
Gene Ontology enrichment of ocular sebaceous carcinoma
No.	Category	ID	Description	strength	false discovery rate
1	GO: Biological Process	GO:0048009	insulin-like growth factor receptor signaling pathway	2.18	0.00012
2	GO: Biological Process	GO:0006337	nucleosome disassembly	2.14	4.43e-06
3	GO: Biological Process	GO:0014065	phosphatidylinositol 3-kinase signaling	2.1	3.33e-10
4	GO: Biological Process	GO:2000615	regulation of histone H3-K9 acetylation	2.07	0.0065
5	GO: Biological Process	GO:0043276	anoikis	2.07	0.0065
6	GO: Biological Process	GO:0051095	regulation of helicase activity	2.04	0.0075
7	GO: Biological Process	GO:0090399	replicative senescence	2	0.0085
8	GO: Biological Process	GO:0071157	negative regulation of cell cycle arrest	1.93	0.00048
9	GO: Biological Process	GO:0007221	positive regulation of transcription of Notch receptor target	1.86	0.0137
10	GO: Biological Process	GO:0038128	ERBB2 signaling pathway	1.79	0.001
Gene Ontology enrichment of ocular sebaceous carcinoma
No.	Category	ID	Description	strength	false discovery rate
1	GO: Molecular Function	GO:0016303	1-phosphatidylinositol-3-kinase activity	2.29	0.00044
2	GO: Molecular Function	GO:0043560	insulin receptor substrate binding	2.12	0.0133
3	GO: Molecular Function	GO:1990756	ubiquitin ligase-substrate adaptor activity	1.97	0.0203
4	GO: Molecular Function	GO:0070577	lysine-acetylated histone binding	1.81	0.0342
5	GO: Molecular Function	GO:0002039	p53 binding	1.75	3.7e-06
6	GO: Molecular Function	GO:0050681	androgen receptor binding	1.65	0.0069
7	GO: Molecular Function	GO:0001046	core promoter sequence-specific DNA binding	1.62	0.0078
8	GO: Molecular Function	GO:0001102	RNA polymerase II activating transcription factor binding	1.57	0.0094
9	GO: Molecular Function	GO:0030971	receptor tyrosine kinase binding	1.56	0.0015
10	GO: Molecular Function	GO:0003684	damaged DNA binding	1.49	0.0133
Gene Ontology enrichment of extraocular sebaceous carcinoma
No.	Category	ID	Description	strength	false discovery rate
1	GO: Biological Process	GO:0007221	positive regulation of transcription of Notch receptor target	2.59	6.11e-09
2	GO: Biological Process	GO:0051095	regulation of helicase activity	2.37	0.0025
3	GO: Biological Process	GO:0048505	regulation of timing of cell differentiation	2.33	0.0028
4	GO: Biological Process	GO:1903025	regulation of RNA polymerase II regulatory region sequence-specific DNA binding	2.27	0.0035
5	GO: Biological Process	GO:0042771	intrinsic apoptotic signaling pathway in response to DNA damage by p53 class mediator	2.15	0.00016
6	GO: Biological Process	GO:2000737	negative regulation of stem cell differentiation	2.12	0.0059
7	GO: Biological Process	GO:0071157	negative regulation of cell cycle arrest	2.08	0.0068
8	GO: Biological Process	GO:0060765	regulation of androgen receptor signaling pathway	2.05	0.0078
9	GO: Biological Process	GO:0006977	DNA damage response, signal transduction by p53 class mediator resulting in cell cycle arrest	1.98	1.7e-05
10	GO: Biological Process	GO:0034644	cellular response to UV	1.93	1.54e-06
Gene Ontology enrichment of extraocular sebaceous carcinoma
No.	Category	ID	Description	strength	false discovery rate
1	GO: Molecular Function	GO:0005112	Notch binding	2.22	0.0012
2	GO: Molecular Function	GO:0002039	p53 binding	2.01	6.85e-06
3	GO: Molecular Function	GO:0001085	RNA polymerase II transcription factor binding	1.87	0.0037
4	GO: Molecular Function	GO:0003684	damaged DNA binding	1.82	0.0047
5	GO: Molecular Function	GO:0031625	ubiquitin protein ligase binding	1.37	0.0013
6	GO: Molecular Function	GO:0003713	transcription coactivator activity	1.34	0.0013
7	GO: Molecular Function	GO:0003682	chromatin binding	1.17	0.0013
8	GO: Molecular Function	GO:0008134	transcription factor binding	1.02	0.0164
9	GO: Molecular Function	GO:0000976	transcription regulatory region sequence-specific DNA binding	0.91	0.0116
10	GO: Molecular Function	GO:0005102	signaling receptor binding	0.79	0.0116

## Sheet: Table S4.
Table S4. Cases showing alterations in mismatch repair genes
Sample 7 SeC-O		Sample 26 SeC-O		Sample 28 SeC-O		Sample 14 SeC-EO		Sample 27 SeC-EO
MMR gene	Mutation (VAF, %)	MMR gene	Mutation (VAF, %)	MMR gene	Mutation (VAF, %)	MMR gene	Mutation (VAF, %)	MMR gene	Mutation (VAF, %)
MSH6	p.R1242H (5.88)	MLH1	p.Y126* (6.25)	MSH6	p.A339S (7.35)	MSH2	p.S77Cfs*4 (23.08)	MSH2	p.R680* (73.17)
				MSH6	p.A342Kfs*37 (7.25)	MSH2	p.E378Kfs*34 (21.88)	MSH6	p.F1088Lfs*5 (47.66)
								MSH6	p.D284Ifs*7 (13.85)
Other pathogenic mutations		Other pathogenic mutations		Other pathogenic mutations		Other pathogenic mutations		Other pathogenic mutations
TP53	p.R342*	ATM	p.A2832C	APC	p.Q1596Dfs*35	BAP1	p.E198Rfs*33	ATM	p.R457*
		BRCA2	p.Q3066*	CREBBP	p.G677Lfs*7	NF1	p.Q1724Tfs*33	DNMT3A	p.P904L
		KMT2A	p.P570Lfs*11	IDH1	p.Y272*	NF1	p.I679Rfs*10	FGFR2	p.E566G
		KMT2A	p.A676Lfs*23	KMT2A	p.V231Dfs*20	NOTCH1	p.A465T	KMT2A	p.R3704*
		KMT2A	p.P1335Kfs*37	NF1	p.Q400*	PIK3R1	p.Arg348*	NOTCH1	p.A465T
		NF1	p.Q531Tfs*26	PIK3CA	p.H1047R			NOTCH1	p.R365C
		NF1	p.R2713Lfs*16	PTEN	p.P419Kfs*8			NOTCH2	p.W1758*
		RB1	p.E79*	TP53	p.Q144*			TP53	p.R175C
		RNF43	p.Q152Sfs*7
		RUNX1	p.R204Q
		SMAD4	p.R361C
		TP53	p.R175H
		TP53	p.R342P
		TP53	c.920-1G>A
SeC-O, ocular sebaceous carcinoma; SeC-EO, extraocular sebaceous carcinoma; VAF, variant allele frequency
